# Supplementary material
Source: PubMed Central journal article supplement (PMC3512000)
Supplement: mmc1.pdf [file mmc1.pdf]

## Supplemental Data

### Exome Sequencing and Functional Validation

#### in Zebrafish Identify *GTDC2* Mutations

#### as a Cause of Walker-Warburg Syndrome

M. Chiara Manzini, Dimira E. Tambunan, R. Sean Hill, Tim W. Yu, Thomas M. Maynard, Erin L. Heinzen, Kevin V. Shianna, Christine R. Stevens, Jennifer N. Partlow, Brenda J. Barry, Jacqueline Rodriguez, Vandana A. Gupta, Abdel-Karim Al-Qudah, Wafaa M. Eyaid, Jan M. Friedman, Mustafa A. Salih, Robin Clark, Isabella Moroni, Marina Mora, Alan H. Beggs, Stacey B. Gabriel, and Christopher A. Walsh

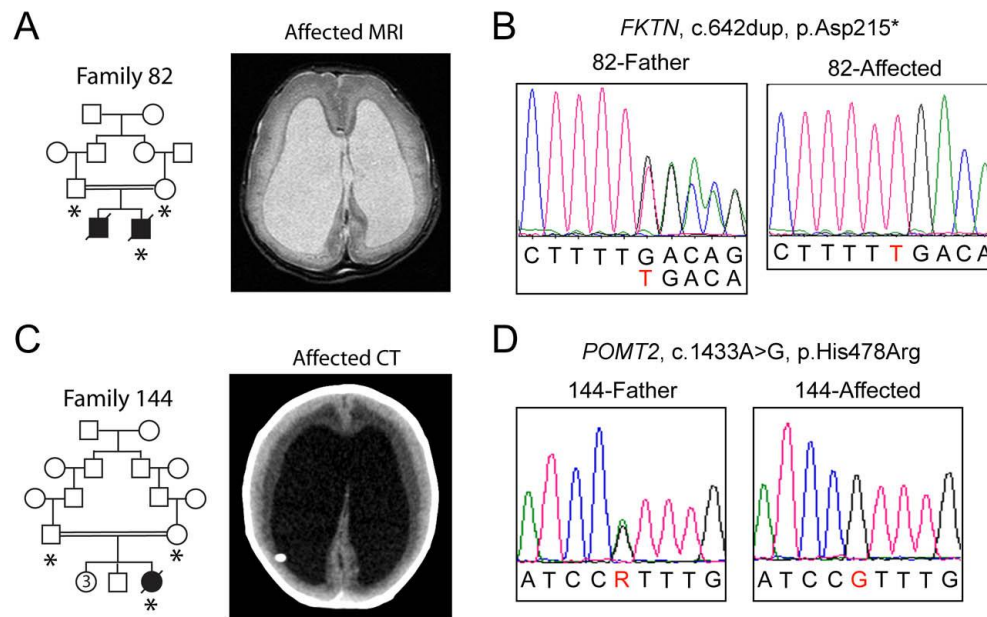

**Figure S1. Alleles in *FKTN* and *POMT2* Identified by WES in Individuals Affected by WWS**

(A) Pedigree structure of family 82 (DNA was available for individuals with asterisks) and axial MRI image of the proband showing hydrocephalus and cortical dysplasia.

(B) Sanger sequencing confirmation of the frameshift *FKTN* mutation in the father and the affected individual.

(C) Pedigree structure of family 144 and an axial CT image of the proband also displaying severe hydrocephalus and thin cortical mantle. The shunt inserted for draining excess cerebrospinal fluid appears as a bright spot on the lower left.

(D) Sanger sequencing confirmation of the novel *POMT2* mutations identified in this family.

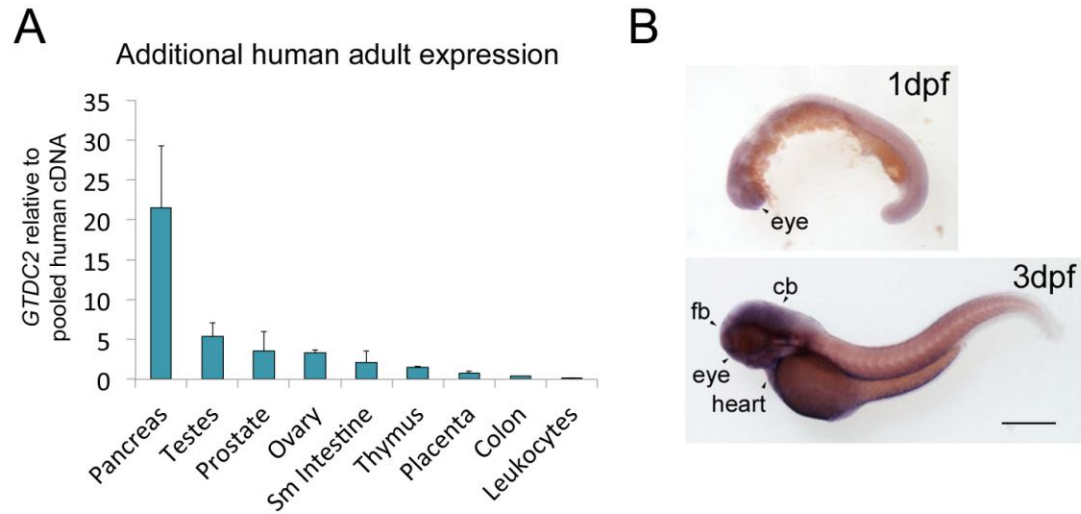

**Figure S2. Additional *GTDC2* Expression in Human and Zebrafish**

(A) Additional qPCR analysis of *GTDC2* expression in adult human tissues. Highest relative expression was identified in the pancreas and expression levels comparable to those observed in the brain and muscle were also present in the reproductive organs.

(B) Zebrafish *gtdc2* expression is observed throughout the body at 16 hr post fertilization and strongly in the brain (fb = forebrain, cb = cerebellum), eye and heart at 3 dpf. Scale bar: 500  $\mu$ m.

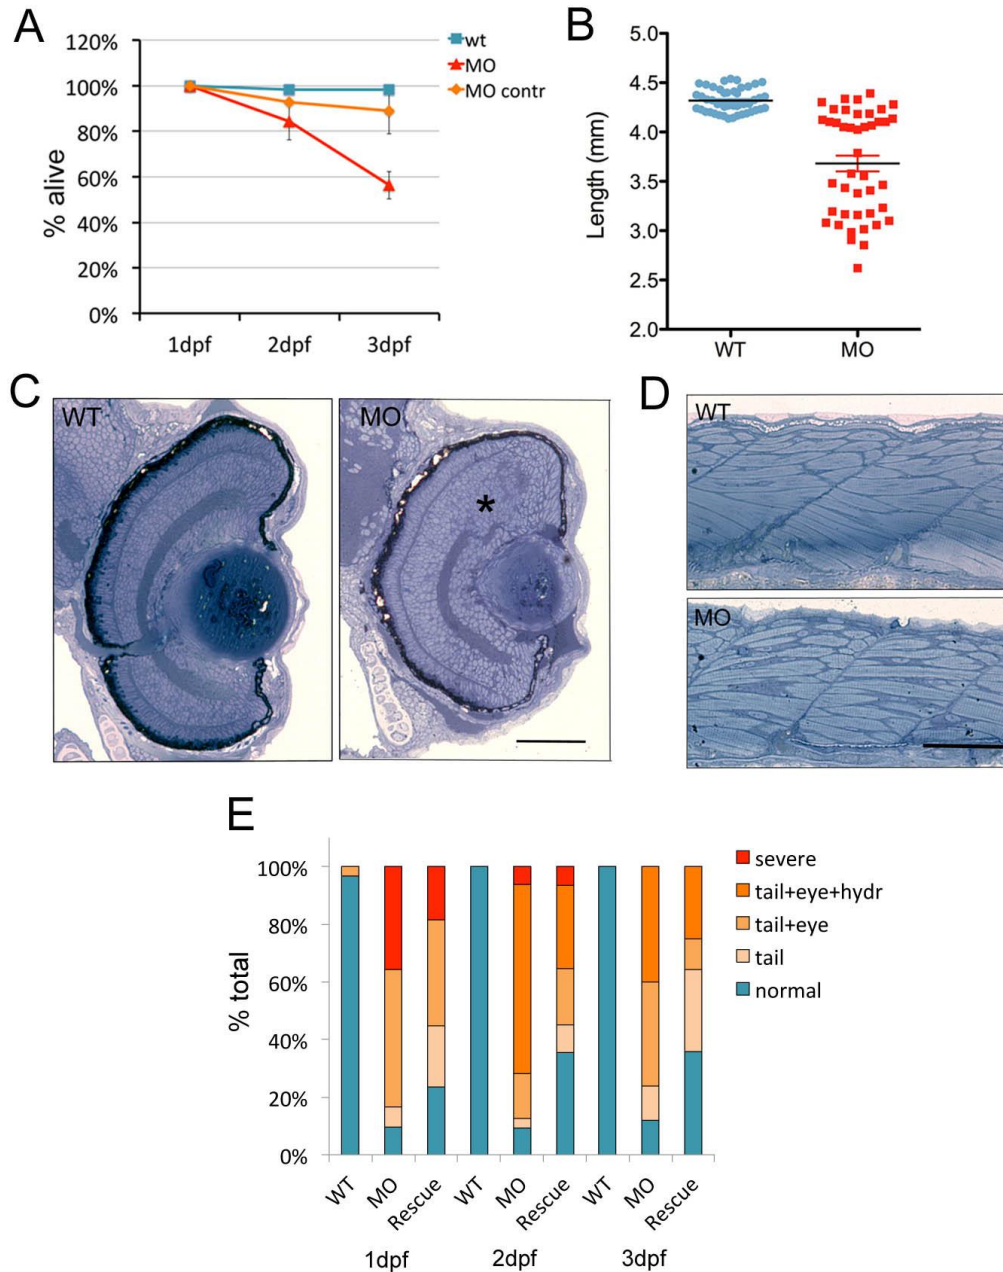

**Figure S3. Analysis of the Zebrafish *gtdc2* Morphant Embryos and Larvae**

(A) Reduced survival is observed during the first three days post injection in the MO injected embryos when compared to wild-type (wt) and embryos injected with a control MO.

(B) Body length is variable and significantly reduced in 3 dpf *gtdc2* morphants compared to wild-type.

(C–D) Toluidine blue staining shows severe disruptions in organization of the retinal epithelium (asterisk in C; Scale bar: 100  $\mu$ m) and disorganization of muscle fibers in the *gtdc2* morphants (scale bar in D represents 50  $\mu$ m).

(E) Developmental analysis of different phenotypes observed in *gtdc2* morphants during the first 3 dpf. Embryos were assigned to different groups depending on which areas were affected: tail = slow moving tail with U-shaped somite and disorganized looking muscle fibers, normal eye and head; tail + eye = affected tail, plus small eye and/or failure of ventral retinal to fuse; tail + eye + hydr = affected tail and eye, plus evident hydrocephalus; severe= stunted tail, no discernible eye and head structures. Rescue with the human *GTDC2* mRNA showed an improvement in the more severe phenotypes. The disappearance of the severe category is due to the death of these embryos between 2 and 3 dpf. Four independent rescue experiments were performed with similar results.

**Table S1. Summary of Consanguineous WWS Cohort**

| Family     | Relationship           | Affected <sup>a</sup> | Homozygosity | WES | Gene         | Reference  |
|------------|------------------------|-----------------------|--------------|-----|--------------|------------|
| <b>3</b>   | 1 <sup>st</sup> cousin | 1                     | 5.9%         | Y   |              |            |
| <b>5</b>   | 2 <sup>nd</sup> cousin | 1 (2)                 | 12.8%        |     |              |            |
| <b>12</b>  | 1 <sup>st</sup> cousin | 1                     | 7.6%         |     | <i>POMT2</i> | (6) Fam 7  |
| <b>21</b>  | 3 <sup>rd</sup> cousin | 1                     | 16.4%        | Y   |              |            |
| <b>66</b>  | unknown                | 1                     | 7.8%         |     | <i>FKTN</i>  | (6) Fam 13 |
| <b>70</b>  | 1 <sup>st</sup> cousin | 1 (2)                 | 12.5%        |     |              |            |
| <b>82</b>  | 1 <sup>st</sup> cousin | 1 (1)                 | 7.4%         | Y   | <i>FKTN</i>  | This study |
| <b>90</b>  | 1 <sup>st</sup> cousin | 1                     | 11.2%        | Y   | <i>GTDC2</i> | This study |
| <b>94</b>  | 3 <sup>rd</sup> cousin | 1                     | 3.7%         |     |              |            |
| <b>96</b>  | 1 <sup>st</sup> cousin | 1 (1)                 | 11.2%        |     | <i>POMT1</i> | (6) Fam 4  |
| <b>100</b> | 1 <sup>st</sup> cousin | 1                     | 10.6%        | Y   | <i>GTDC2</i> | This study |
| <b>120</b> | 1 <sup>st</sup> cousin | 1 (1)                 | n/a          |     | <i>POMT1</i> | (6) Fam 5  |
| <b>132</b> | 1 <sup>st</sup> cousin | 2                     | 3.2%         |     | <i>POMT1</i> | (6) Fam 6  |
| <b>139</b> | 1 <sup>st</sup> cousin | 1                     | 9.7%         |     | <i>POMT1</i> | (6) Fam 1  |
| <b>140</b> | 1 <sup>st</sup> cousin | 1                     | 9.9%         |     | <i>POMT2</i> | (6) Fam 9  |
| <b>141</b> | 1 <sup>st</sup> cousin | 1                     | 12.6%        |     | <i>FKRP</i>  | (6) Fam 11 |
| <b>143</b> | 1 <sup>st</sup> cousin | 2                     | n/a          |     | <i>POMT1</i> | (6) Fam 2  |
| <b>144</b> | 2 <sup>nd</sup> cousin | 1                     | 5.3%         | Y   | <i>POMT2</i> | This study |
| <b>145</b> | 1 <sup>st</sup> cousin | 2                     | 7.4%         | Y   |              |            |

WES = whole-exome sequencing

<sup>a</sup> in parentheses: additional affected individuals for whom DNA is not available

**Table S2. Whole-Exome-Sequencing Statistics**

| Family     | Total Variants | In ROH | Pathogenic/R are | Correct Inheritance | Missense | Truncating (stop,spl,fs) | Gene         |
|------------|----------------|--------|------------------|---------------------|----------|--------------------------|--------------|
| <b>3</b>   | 56,041         | 5,040  | 10               | 5                   | 5        | 0                        |              |
| <b>21</b>  | 64,860         | 2,669  | 2                | 0                   | 0        | 0                        |              |
| <b>82</b>  | 36,618         | 1,622  | 11               | 9                   | 8        | 1 fs                     | <i>FKTN</i>  |
| <b>90</b>  | 34,322         | 1,866  | 6                | 6                   | 4        | 1 stop, 1 fs             | <i>GTDC2</i> |
| <b>100</b> | 55,951         | 8,603  | 17               | 5                   | 5        | 0                        | <i>GTDC2</i> |
| <b>144</b> | 63,080         | 4,656  | 16               | 9                   | 7        | 1 stop, 1 fs             | <i>POMT2</i> |
| <b>145</b> | 36,679         | 602    | 4                | 2                   | 2        | 0                        |              |

spl = splicing, fs = frameshift
